# Supplementary material
Source: Springer Nature journal article supplement (https://www.springermedizin.de/resource/supplementary/13046_2009_179_MOESM9_ESM.pdf/9661800)
Supplement: MOESM9 [file 9661800]

Epithelioid

Sarcomatoid

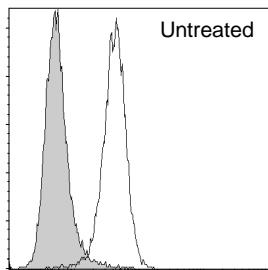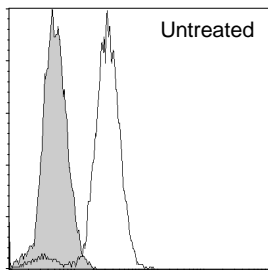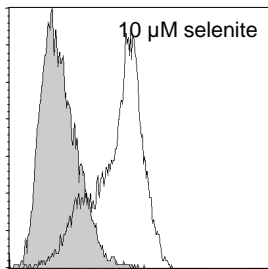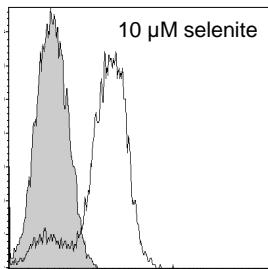

Counts  $\rightarrow$

Procaspase-3  $\rightarrow$

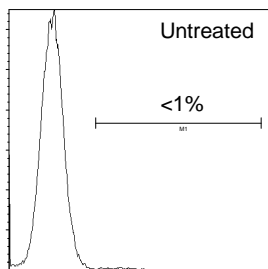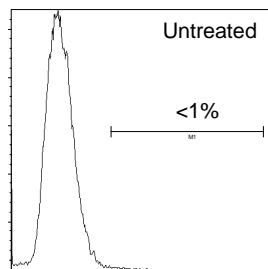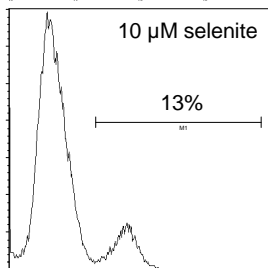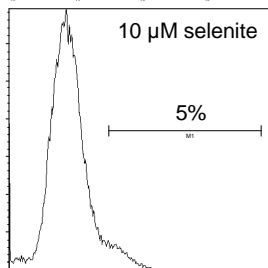

Counts  $\rightarrow$

Active caspase-3  $\rightarrow$
